# Supplementary material for: Inducible secretion of LIGHT by engineered probiotics enables localized cytokine therapy and robust antitumor immunity
Source: Royal Society of Chemistry journal article supplement (doi:10.1039/d5ra09644h), 2026-05-18
Supplement: d5ra09644h1.pdf [file d5ra09644h1.pdf]

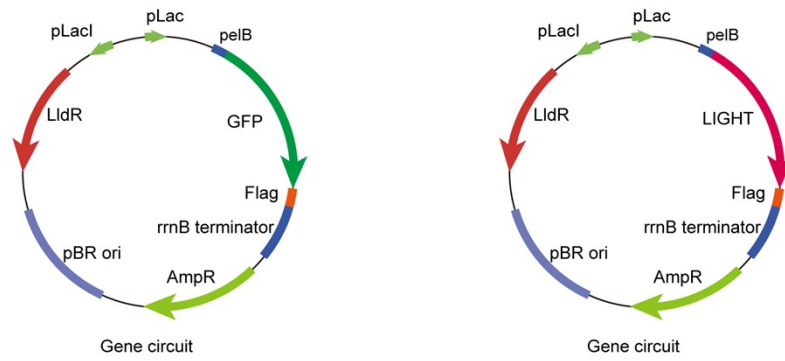

**Supplementary Fig. 1.** The expression map of GFP or LIGHT in the engineered bacterial plasmid responding to lactic acid

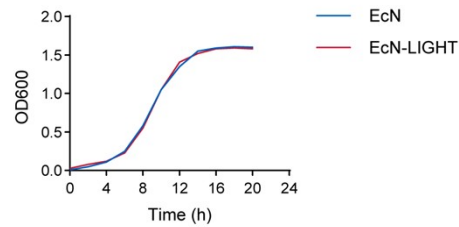

**Supplementary Fig. 2.** The bacterial growth curve was determined by continuously monitoring OD600 after transferring and not transferring the LIGHT plasmid.

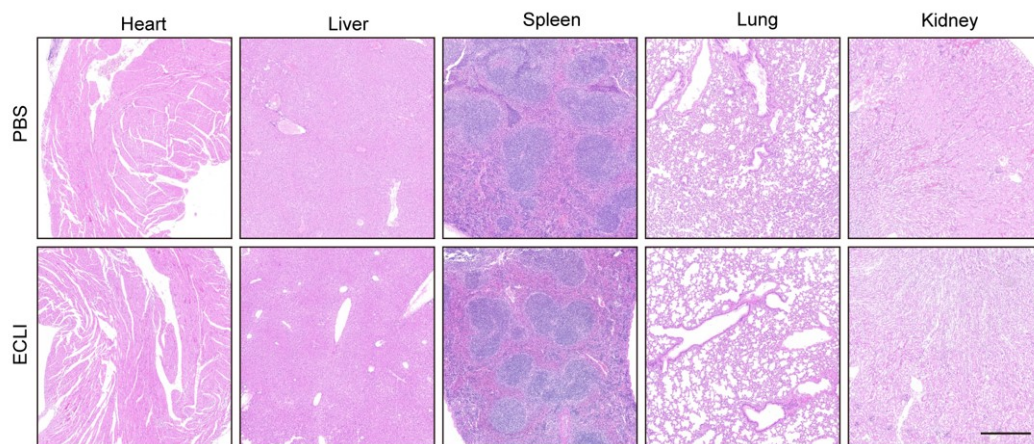

**Supplementary Fig. 3.** Representative H&E staining of heart, liver, spleen, lung, and kidney from

PBS and ECLI mice. No pathological alterations or inflammatory infiltrates were observed, Scale bar=100  $\mu$ m.

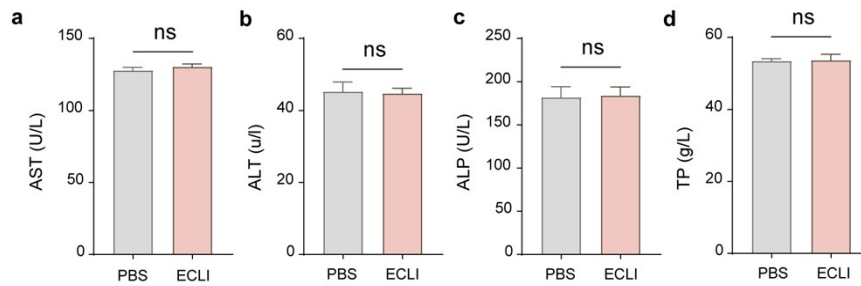

**Supplementary Fig. 4.** (a-d) Serum biochemical indices showing comparable AST, ALT, ALP, and TP levels between groups, indicating preserved liver function. Data represent mean  $\pm$  SEM,  $n = 3$  mice per group.

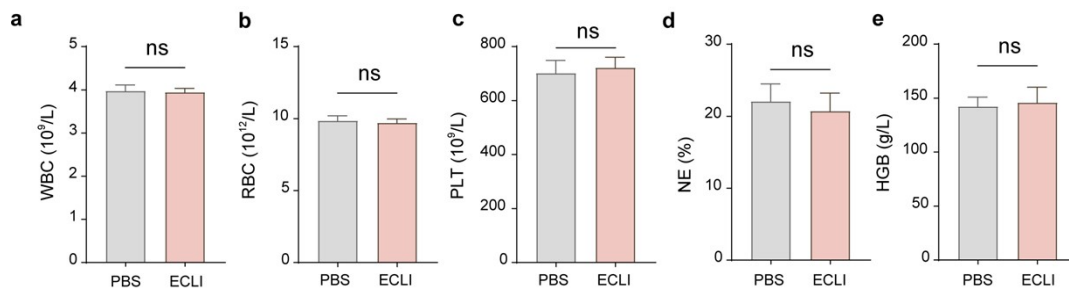

**Supplementary Fig. 5.** (a-e) Hematological parameters including WBC, RBC, PLT, NE, and HGB counts, all within normal ranges and statistically nonsignificant (*ns*). Data represent mean  $\pm$  SEM,  $n = 3$  mice per group.

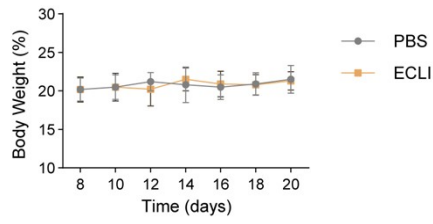

**Supplementary Fig. 6.** Changes in mouse body weight following different treatments

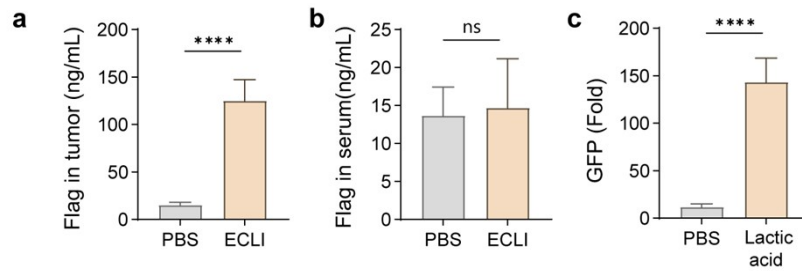

**Supplementary Fig. 7.** Detection of the Flag tag in tumors and serum (a, b); the Flag tag indicates LIGHT levels. Tumors were isolated and cultured, and expression was induced with lactate (c)

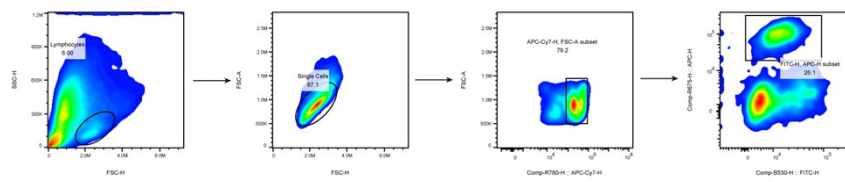

**Supplementary Fig. 8.** Flow cytometric analysis of CD45<sup>+</sup> CD3<sup>+</sup>CD8<sup>+</sup> cells.

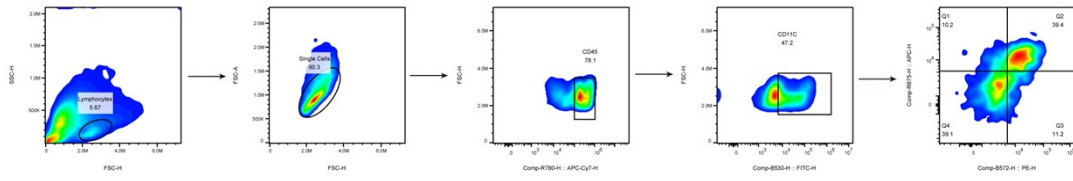

**Supplementary Fig. 9.** Flow cytometric analysis of CD8<sup>+</sup>CD86<sup>+</sup> cells.

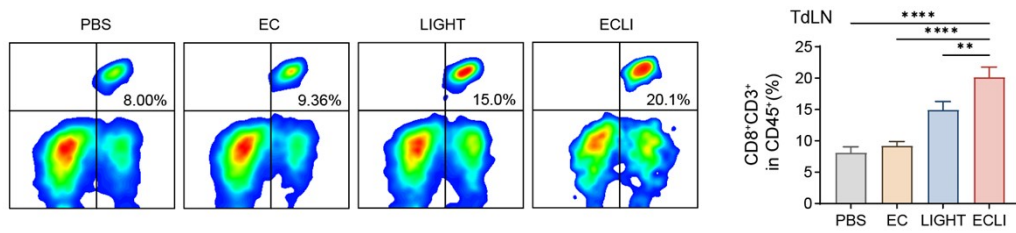

**Supplementary Fig. 10.** Scatter plots and statistical graphs of CD8<sup>+</sup> T cells in tumor-draining lymph nodes obtained via flow cytometry
